# Supplementary material for: Assessing the Influence of Visual-Taste Congruency on Perceived Sweetness and Product Liking in Immersive VR
Source: MDPI journal article supplement (doi:10.3390/foods9040465), 2020-04-09
Supplement: s1 [file s1]

**Table S1.** Nutritional content of taste stimulus used in the experiment.

| Taste stimulus            | Nutritional content (per 100g)                                               |
|---------------------------|------------------------------------------------------------------------------|
| Teisseire grenadine syrup | Energy 328 kcal, fat 0 g, saturates 0 g, carbohydrates 82 g and sugars 82 g. |

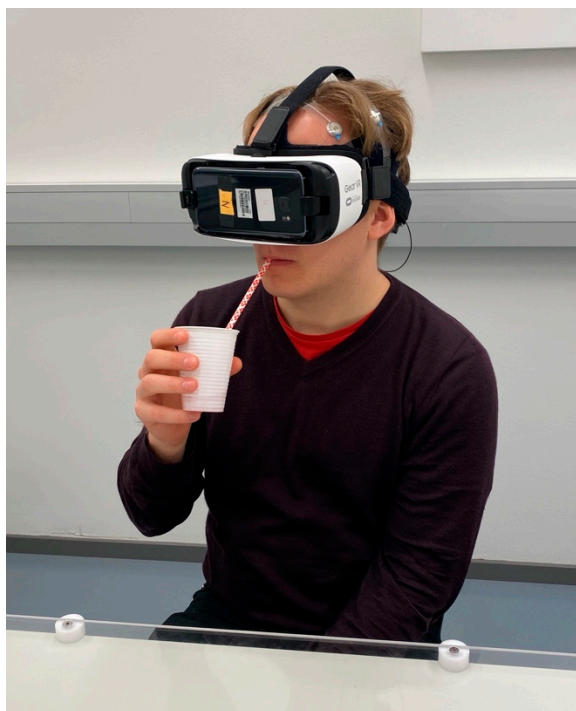

**Figure S1.** Photo of a participant tasting test beverage during VR exposure.

**Table S2.** Background information of experiment participants (n = 41) depicted as mean (SD) or n.

|                                               | Participants (n=41) |
|-----------------------------------------------|---------------------|
| Gender (Male/Female)                          | 17/24               |
| Age                                           | 27.7(2.1)           |
| Self-rated health status <sup>1</sup>         | 4.4(0.5)            |
| Exercise frequency <sup>2</sup>               | 3.7(0.8)            |
| Sweet food consumption frequency <sup>2</sup> | 4(0.9)              |
| Sweet food liking <sup>3</sup>                | 5(0.2)              |
| Familiarity with VR <sup>4</sup>              | 5(0.2)              |

<sup>1</sup>The self-rated health status was measured with a 5-point scale of which 1 = very bad, 3 = neither good or bad; 5 = very good. <sup>2</sup> The frequency of exercise and sweet food consumption were measured with a 5-point scale of which 1 = never, 2 = seldom, 3 = a few times a month, 4=a few times a week,

5=daily. <sup>3</sup> The sweet food liking was measured with a 7-point Likert scale, 1=dislike extremely, 5=neither like or dislike, 7=like extremely. <sup>4</sup> The familiarity level with VR was measured with a 7-point scale, 1= extremely unfamiliar, 5=neither familiar or unfamiliar, 7=extremely familiar.

**Table S3.** Ratings of environment liking (9-point hedonic scale) in pilot survey (n = 138) depicted as mean (SD).

| Environment liking     | Mean (SD)    |
|------------------------|--------------|
| Sweetness environment  | 4.84(1.73)   |
| Bitterness environment | 4.38(2.12)   |
| Neutral environment    | 4.406 (1.45) |
| All environment        | 4.54 (1.80)  |

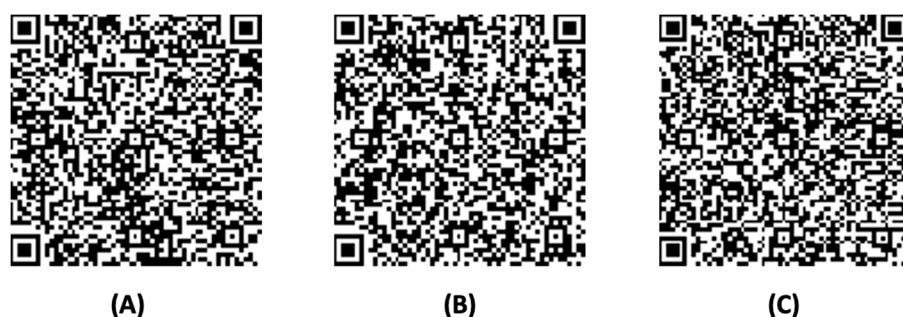

**Figure S2.** QR codes for APK files of three VR environments (A) sweet environment (B) bitter environment (C) neutral environment.

**Table S4.** Questions and choices in experiment survey a.

| Questions                                                                                                            | Choices                                                                                                                                                                                                                                                                                                                                                                                                                                                                    |
|----------------------------------------------------------------------------------------------------------------------|----------------------------------------------------------------------------------------------------------------------------------------------------------------------------------------------------------------------------------------------------------------------------------------------------------------------------------------------------------------------------------------------------------------------------------------------------------------------------|
| How comfortable are you right now?                                                                                   | <ul style="list-style-type: none"> <li>○ Not at all. Extremely (uncomfortable/dislike/not sour/not bitter/ not sweet/unmatched/not vivid)</li> <li>○ Very much (uncomfortable/dislike/ not sour/not bitter/ not sweet/unmatched/not vivid)</li> <li>○ Moderately (uncomfortable/dislike/ not sour/not bitter/ not sweet/unmatched/not vivid)</li> <li>○ Slightly (uncomfortable/dislike/ not sour/not bitter/ not sweet/unmatched/not vivid)</li> <li>○ Neutral</li> </ul> |
| How much did you like the drink you tried just now?                                                                  |                                                                                                                                                                                                                                                                                                                                                                                                                                                                            |
| How sour do you think the drink was?                                                                                 |                                                                                                                                                                                                                                                                                                                                                                                                                                                                            |
| How bitter do you think the drink was?                                                                               |                                                                                                                                                                                                                                                                                                                                                                                                                                                                            |
| How sweet do you think the drink was?                                                                                |                                                                                                                                                                                                                                                                                                                                                                                                                                                                            |
| How much did you like the VR environment you experienced just now?                                                   | <ul style="list-style-type: none"> <li>○ Slightly (comfortable/like it/ sour/ bitter/sweet/matching/ vivid)</li> <li>○ Moderately (comfortable/like it/ sour/bitter/sweet/matching/ vivid)</li> <li>○ Very much (comfortable/like it/ sour/bitter/sweet/matching/ vivid)</li> <li>○ Extremely (comfortable/like it/sour/bitter/sweet/matching/ vivid)</li> </ul>                                                                                                           |
| To what extent you think the VR environment you experienced just now matches the taste of the beverage you just had? |                                                                                                                                                                                                                                                                                                                                                                                                                                                                            |
| How vivid do you think the VR environment was?                                                                       |                                                                                                                                                                                                                                                                                                                                                                                                                                                                            |
|                                                                                                                      |                                                                                                                                                                                                                                                                                                                                                                                                                                                                            |

**Table S5.** Questions and choices in experiment survey b.

| Questions                                                                   | Choices                                                                                                                                                               |
|-----------------------------------------------------------------------------|-----------------------------------------------------------------------------------------------------------------------------------------------------------------------|
| Gender                                                                      | Male/Female                                                                                                                                                           |
| Age                                                                         | Answer in numbers                                                                                                                                                     |
| How would you rate your health status?                                      | Very Bad/Bad/Neither good or bad /Good/Very Good                                                                                                                      |
| How often do you exercise?                                                  | Never/Seldom/A few times per month/A few times per week/Daily                                                                                                         |
| How often do you consume sweet food/beverage?                               |                                                                                                                                                                       |
| How much do you like sweet food/beverage in general?                        | Dislike very much/ Dislike moderately/ Dislike slightly/Neither like or dislike/Like slightly/ Like moderately/ Like very much                                        |
| Before this experiment, how familiar you were with virtual reality glasses? | Very much unfamiliar(never heard of) /Moderately familiar/ Slightly unfamiliar/Neither familiar or unfamiliar/Slight familiar/Moderately familiar/ Very much familiar |
